# Supplementary figures and images for: Frankincense oil derived from Boswellia carteri induces tumor cell specific cytotoxicity
Source: Springer Nature journal article supplement (doi:10.1186/1472-6882-9-6), 2009-03-18

**A**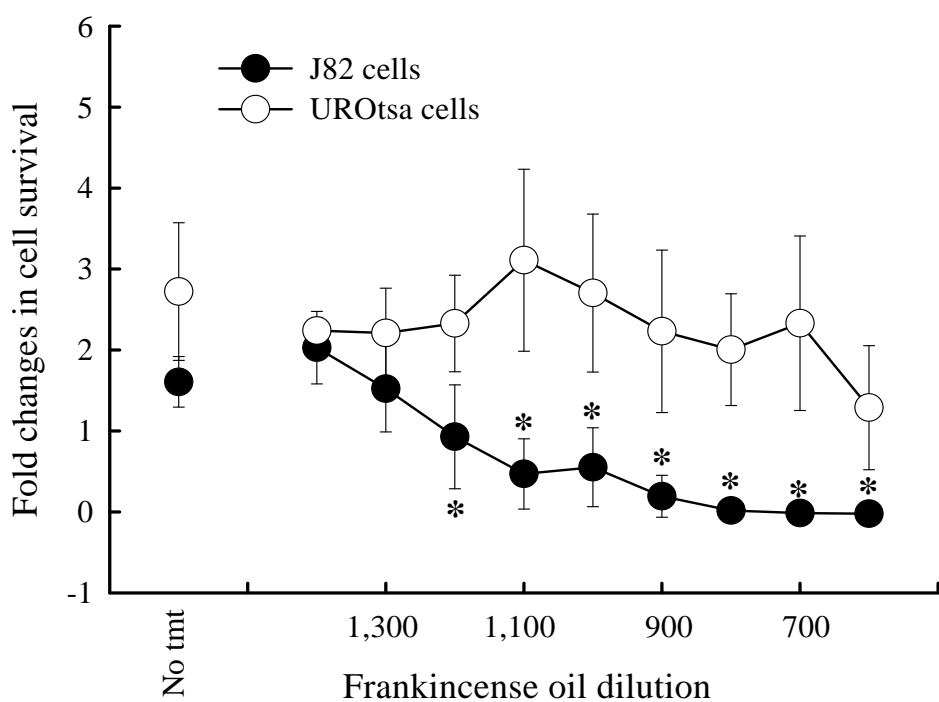**B**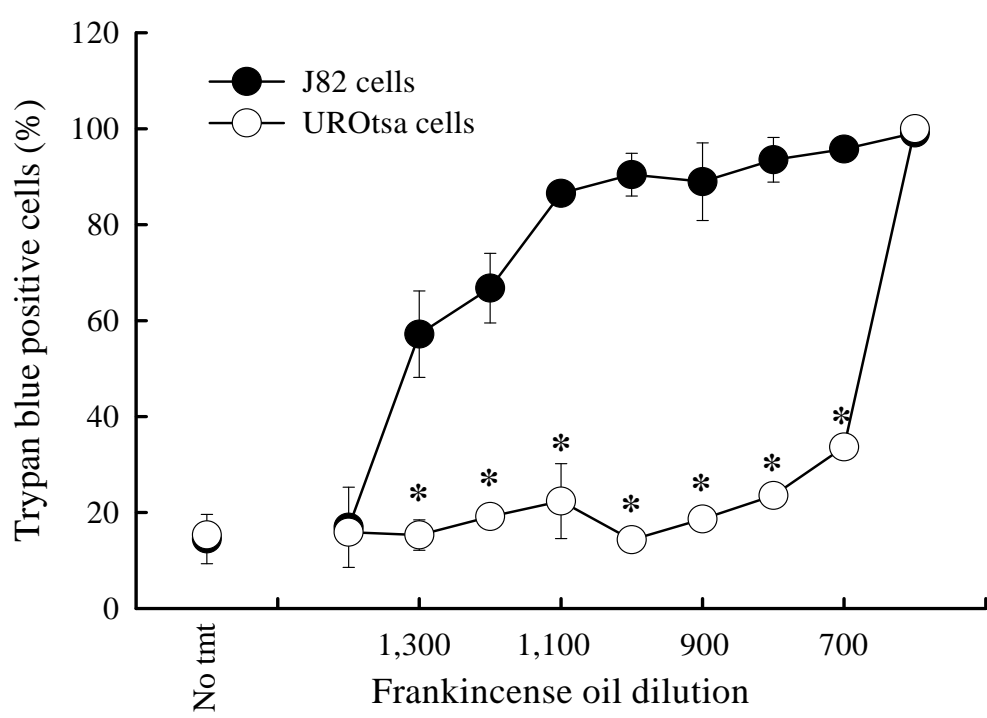

Supplement: 12906_2008_231_MOESM5_ESM.pdf [file 12906_2008_231_MOESM5_ESM.pdf]
